# Supplementary material for: Canine Gastric Cancer: Current Treatment Approaches
Source: MDPI journal article supplement (doi:10.3390/vetsci9080383), 2022-07-26
Supplement: s1 [file s1]

## Supplementary Materials

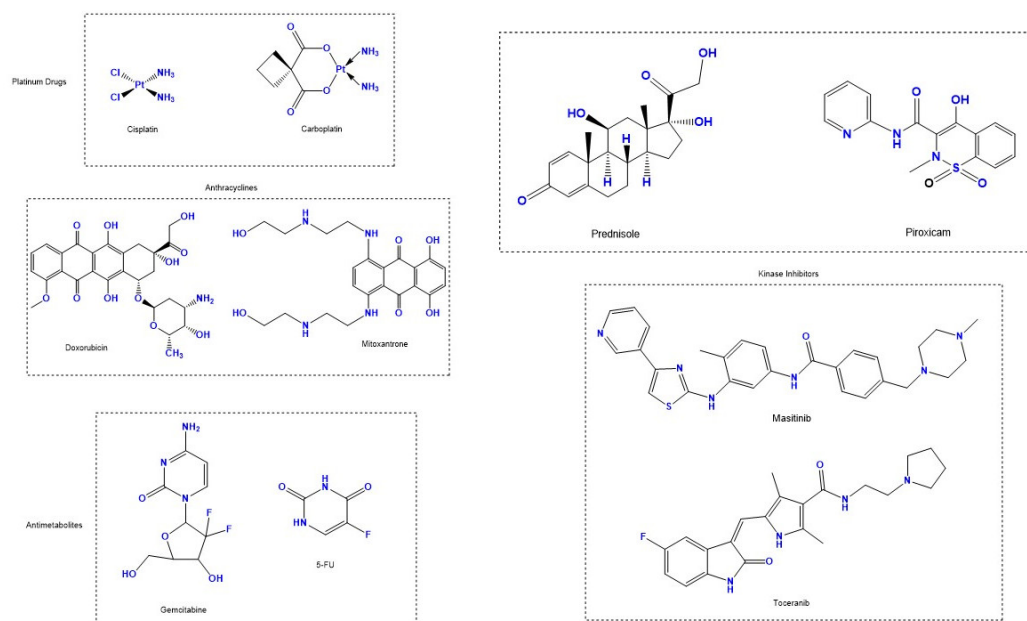

**Figure S1.** Chemical structure of the drugs compounds used in canine gastric cancer treatment.
